# Supplementary material for: Myelin-reactive CD8+ T cells influence conventional dendritic cell subsets towards a mature and regulatory phenotype in experimental autoimmune encephalomyelitis
Source: Springer Nature journal article supplement (doi:10.1186/s12974-025-03377-8), 2025-02-28
Supplement: MOESM1 [file 12974_2025_3377_MOESM1_ESM.pdf]

**Supplementary Figure 1: Timeline for adoptive CD8 transfer and isolation of splenic DC from CD8 recipients for further analysis**

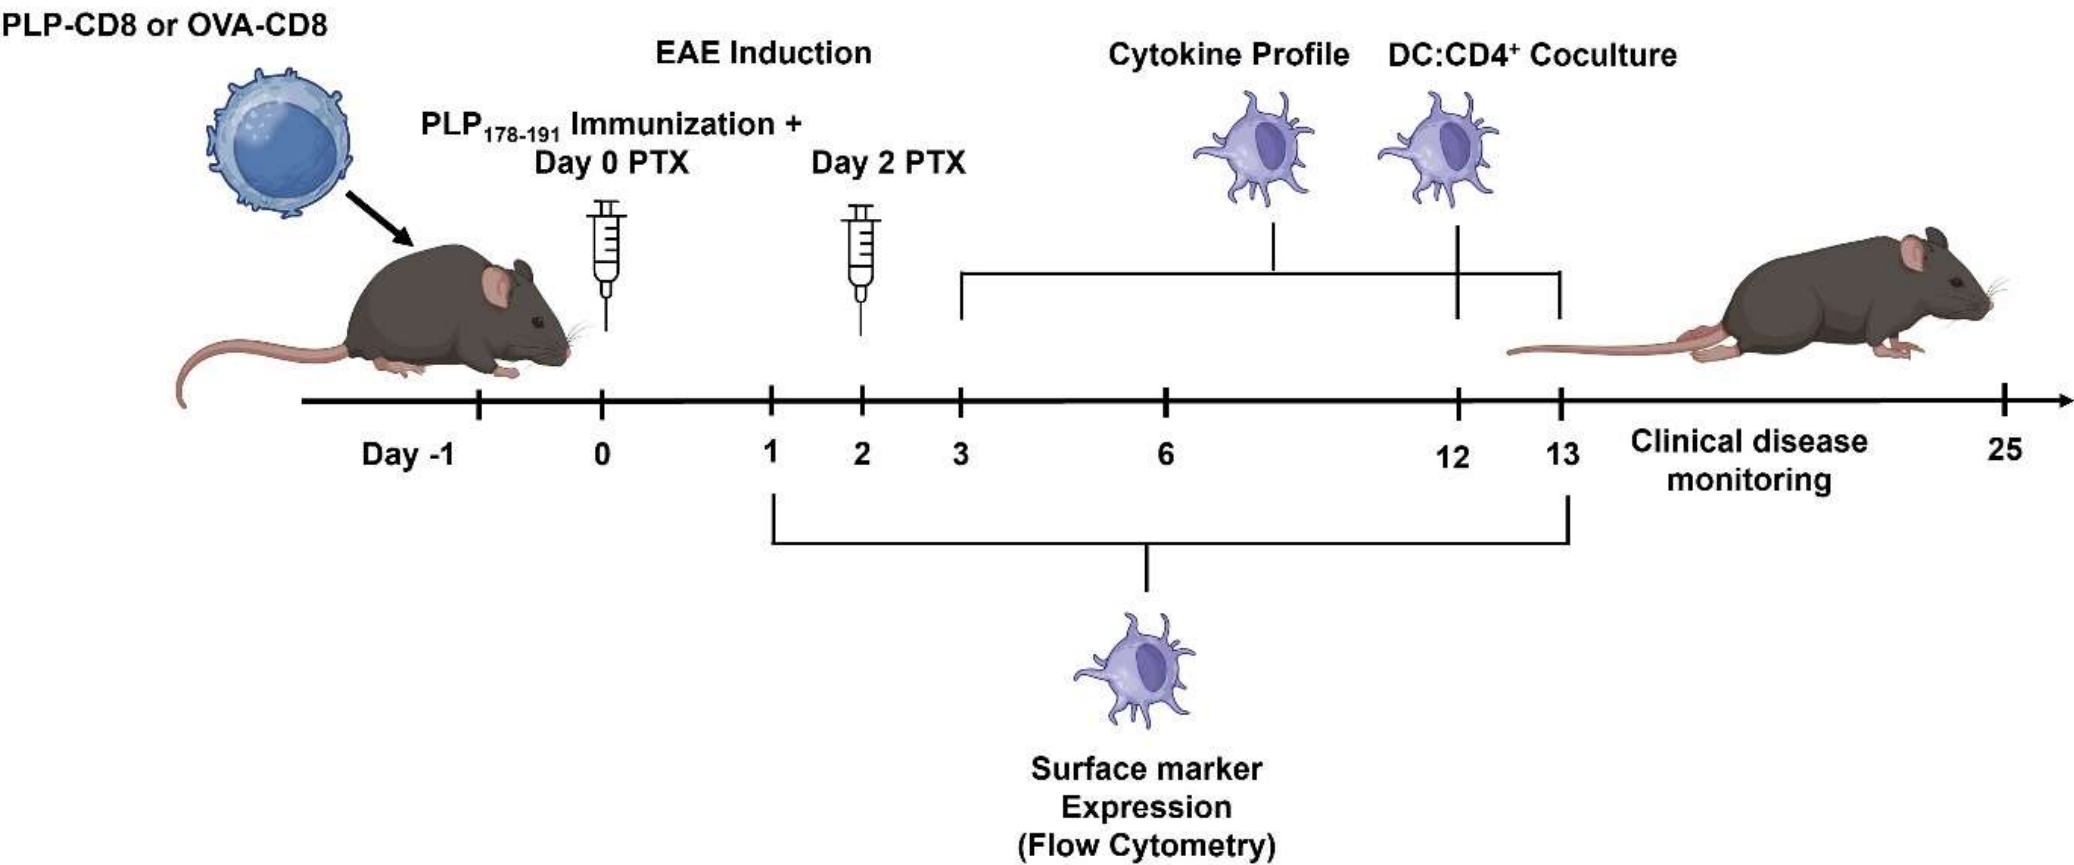

**Supplementary Figure 1: Timeline for adoptive CD8 transfer and isolation of splenic DC from CD8 recipients for further analysis**

Five million PLP-CD8 or OVA-CD8 were adoptively transferred into wild-type recipient mice on day -1. Mice were immunized with PLP<sub>178-191</sub> (100 µg) on day 0 and were given two doses of pertussis toxin (PTX, 250 ng) on days 0 and 2 to induce EAE. Splenic DC were isolated from PLP-CD8 recipients (PLP-CD8-DC) or OVA-CD8 recipients (OVA-CD8-DC) on designated time-points post-EAE induction for further analysis. DC were isolated on days 1, 3, 6 and 13 for phenotypic characterization by flow cytometry, on days 3 and 13 for the assessment of their cytokine profile and on day 12 for evaluating their capacity to support CD4<sup>+</sup> T cell proliferation.

**Supplementary Figure 2: PLP-CD8-DC demonstrate reduced capacity to support CD4<sup>+</sup> T cell proliferation**

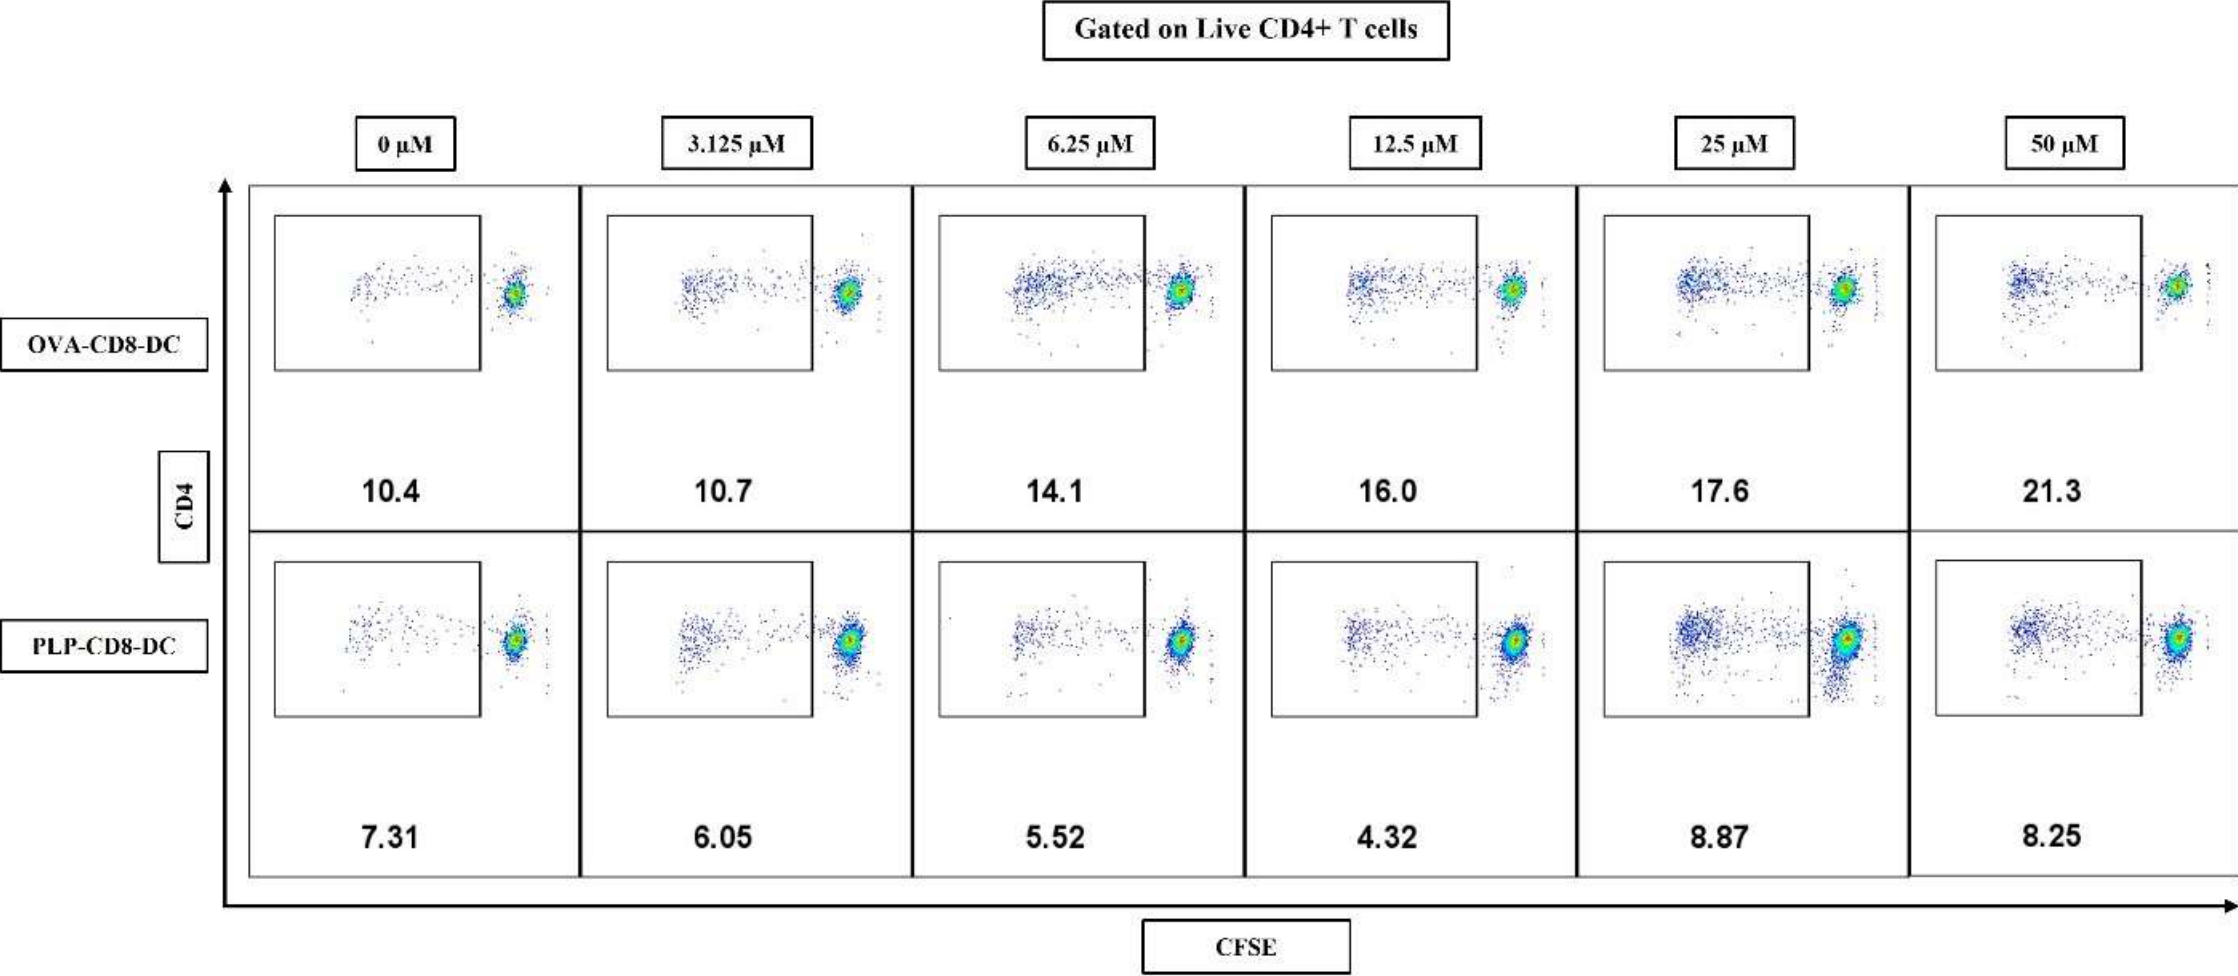

**Supplementary Figure 2: PLP-CD8-DC demonstrate reduced capacity to support CD4<sup>+</sup> T cell proliferation**

Five million PLP-CD8 or OVA-CD8 were adoptively transferred into wild-type recipient mice on day -1. Mice were immunized with PLP<sub>178-191</sub> (100 μg) on day 0 and were given two doses of pertussis toxin (PTX, 250 ng) on days 0 and 2 to induce EAE. Splenic DC were isolated from PLP-CD8 recipients (PLP-CD8-DC) or OVA-CD8 recipients (OVA-CD8-DC) on day 12 post-EAE induction and cultured with CFSE-labelled responder CD4<sup>+</sup> T cells from PLP-immunized mice at a 1:10 ratio (DC: CD4<sup>+</sup>) with increasing concentrations of PLP<sub>178-191</sub> (0 to 50 μM) for 5 days. Cells were stained with Live-Dead Blue and surface marker and analyzed using flow cytometry. CD4<sup>+</sup> T cell proliferation was quantified as the CFSE dilute fraction of live CD4<sup>+</sup> T cells. Representative pseudocolor plots are shown in the figure.

Supplementary Figure 3: Gating strategy for the phenotypic characterization of conventional DC subsets using flow cytometry

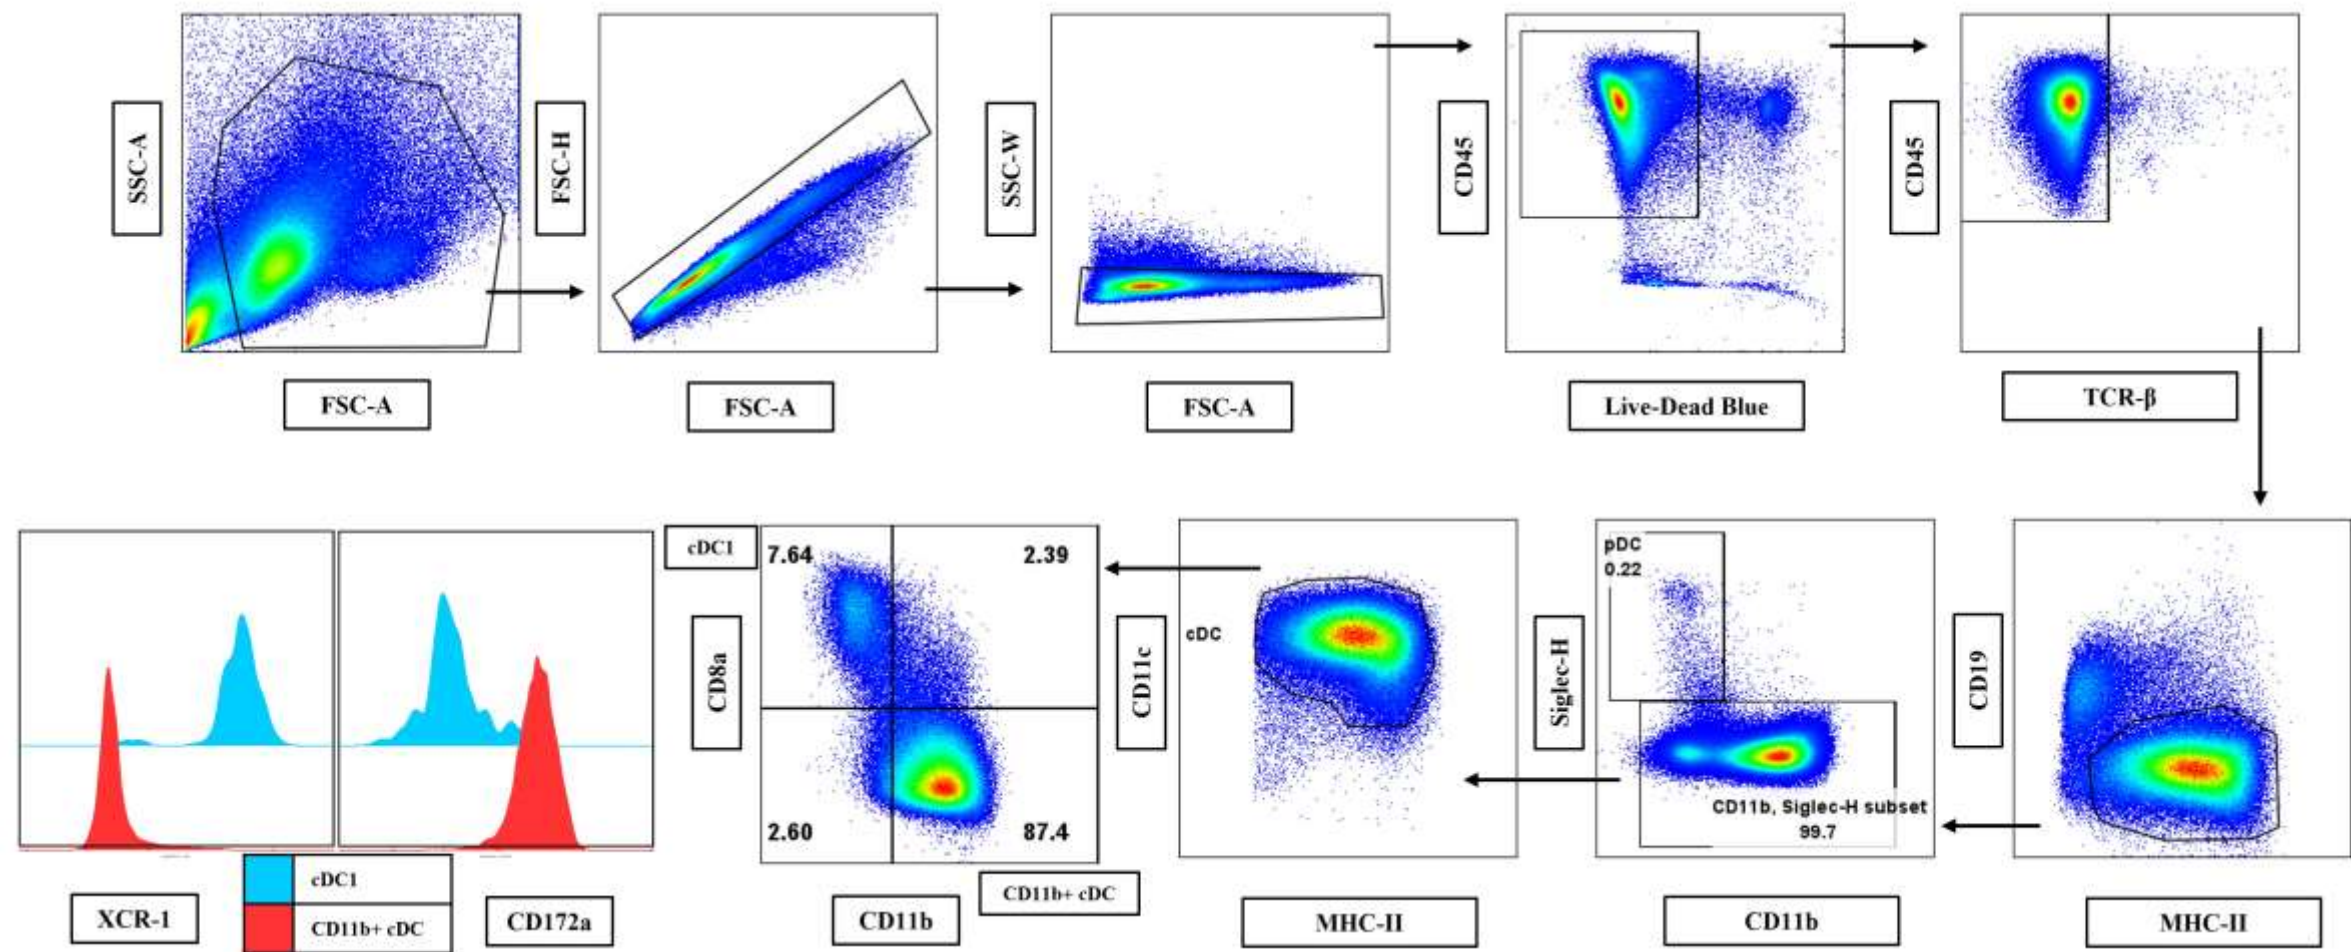

Supplementary Figure 3: Gating strategy for the phenotypic characterization of conventional DC subsets using flow cytometry

PLP-CD8-DC and OVA-CD8-DC were isolated on days 1, 3, 6 and 13 post-EAE induction and stained with Live-Dead Blue and surface markers for the phenotypic characterization of conventional DC (cDC) subsets using flow cytometry. After gating on Live CD45<sup>+</sup> singlets; T cells, B cells and pDC were excluded and cDC were identified as CD11c<sup>hi</sup> MHC-II<sup>hi</sup>. cDC subsets were further distinguished as cDC1 (CD8a<sup>+</sup> CD11b<sup>-</sup>) and CD11b<sup>+</sup> cDC (CD8a<sup>-</sup> CD11b<sup>+</sup>).

**Supplementary Figure 4: PLP-CD8-DC subsets express higher levels of costimulatory and regulatory markers on day 13 post-EAE induction**

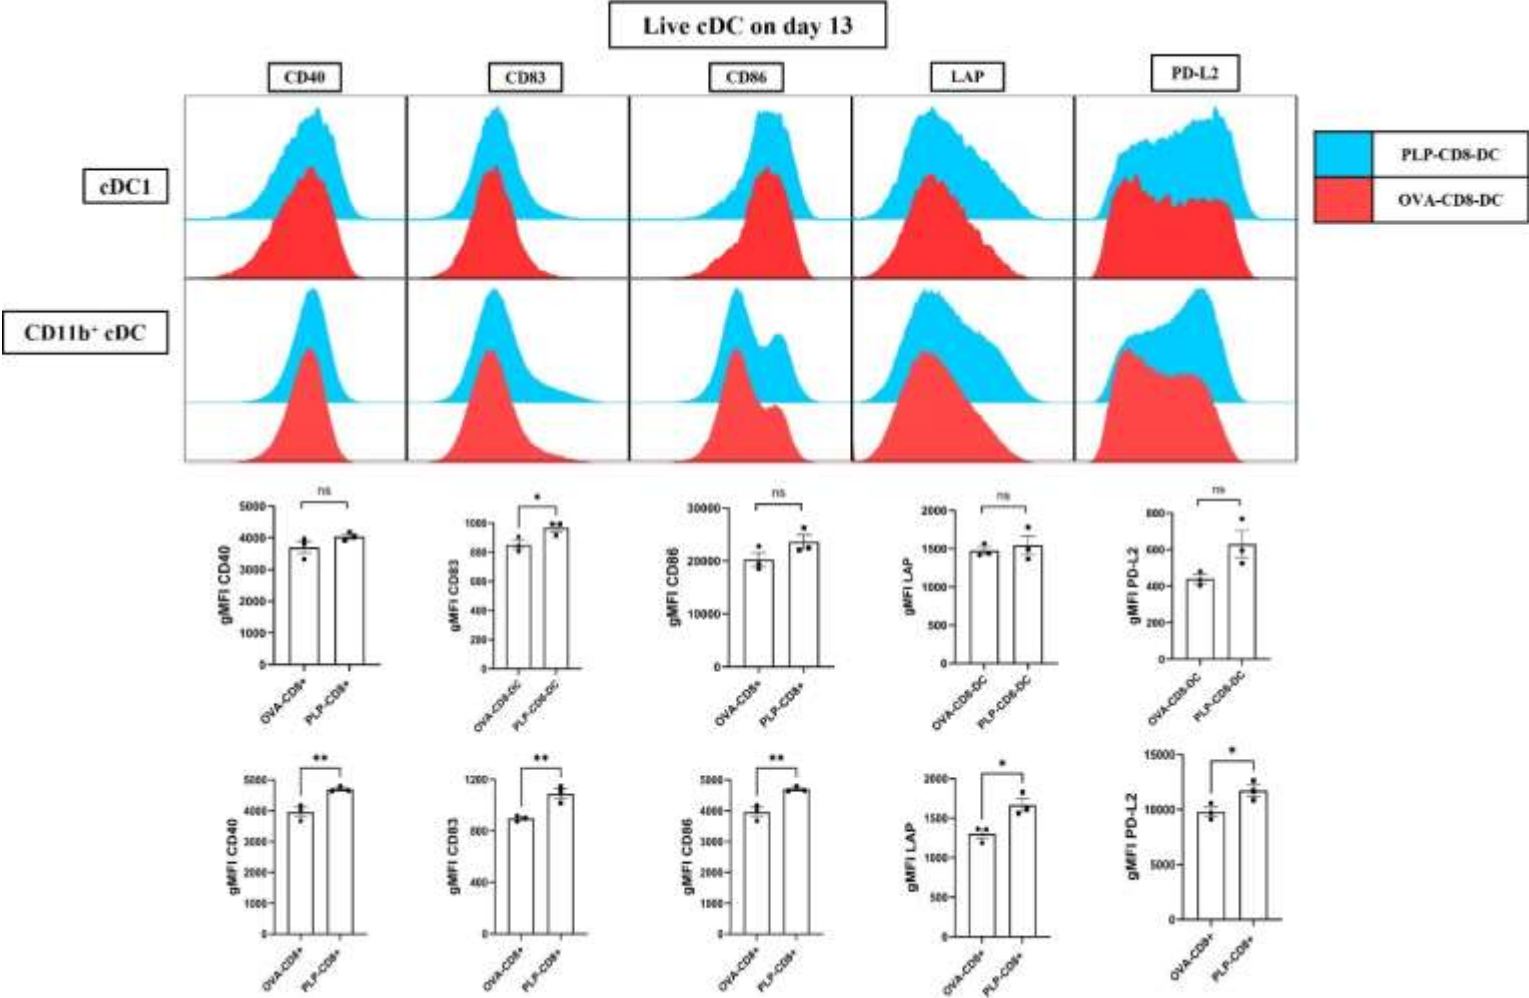

**Supplementary Figure 4: PLP-CD8-DC subsets express higher levels of costimulatory and regulatory markers on day 13 post-EAE induction**

Expression of the costimulatory and regulatory markers on live cDC1 and CD11b<sup>+</sup>cDC isolated on day 13 post-EAE induction was measured in geometric mean fluorescence intensity (gMFI). The cDC1 and CD11b<sup>+</sup>cDC subsets of PLP-CD8-DC displayed higher expression of CD83 and of CD40, CD83, CD86, LAP and PD-L2, than OVA-CD8-DC, respectively (N = 3, T-test, ns = not significant, \*p < 0.05, \*\*p < 0.01).



**Supplementary Figure 5: PLP-CD8-DC subsets exhibit higher coexpression of costimulatory and regulatory markers on day 13 post-EAE induction**

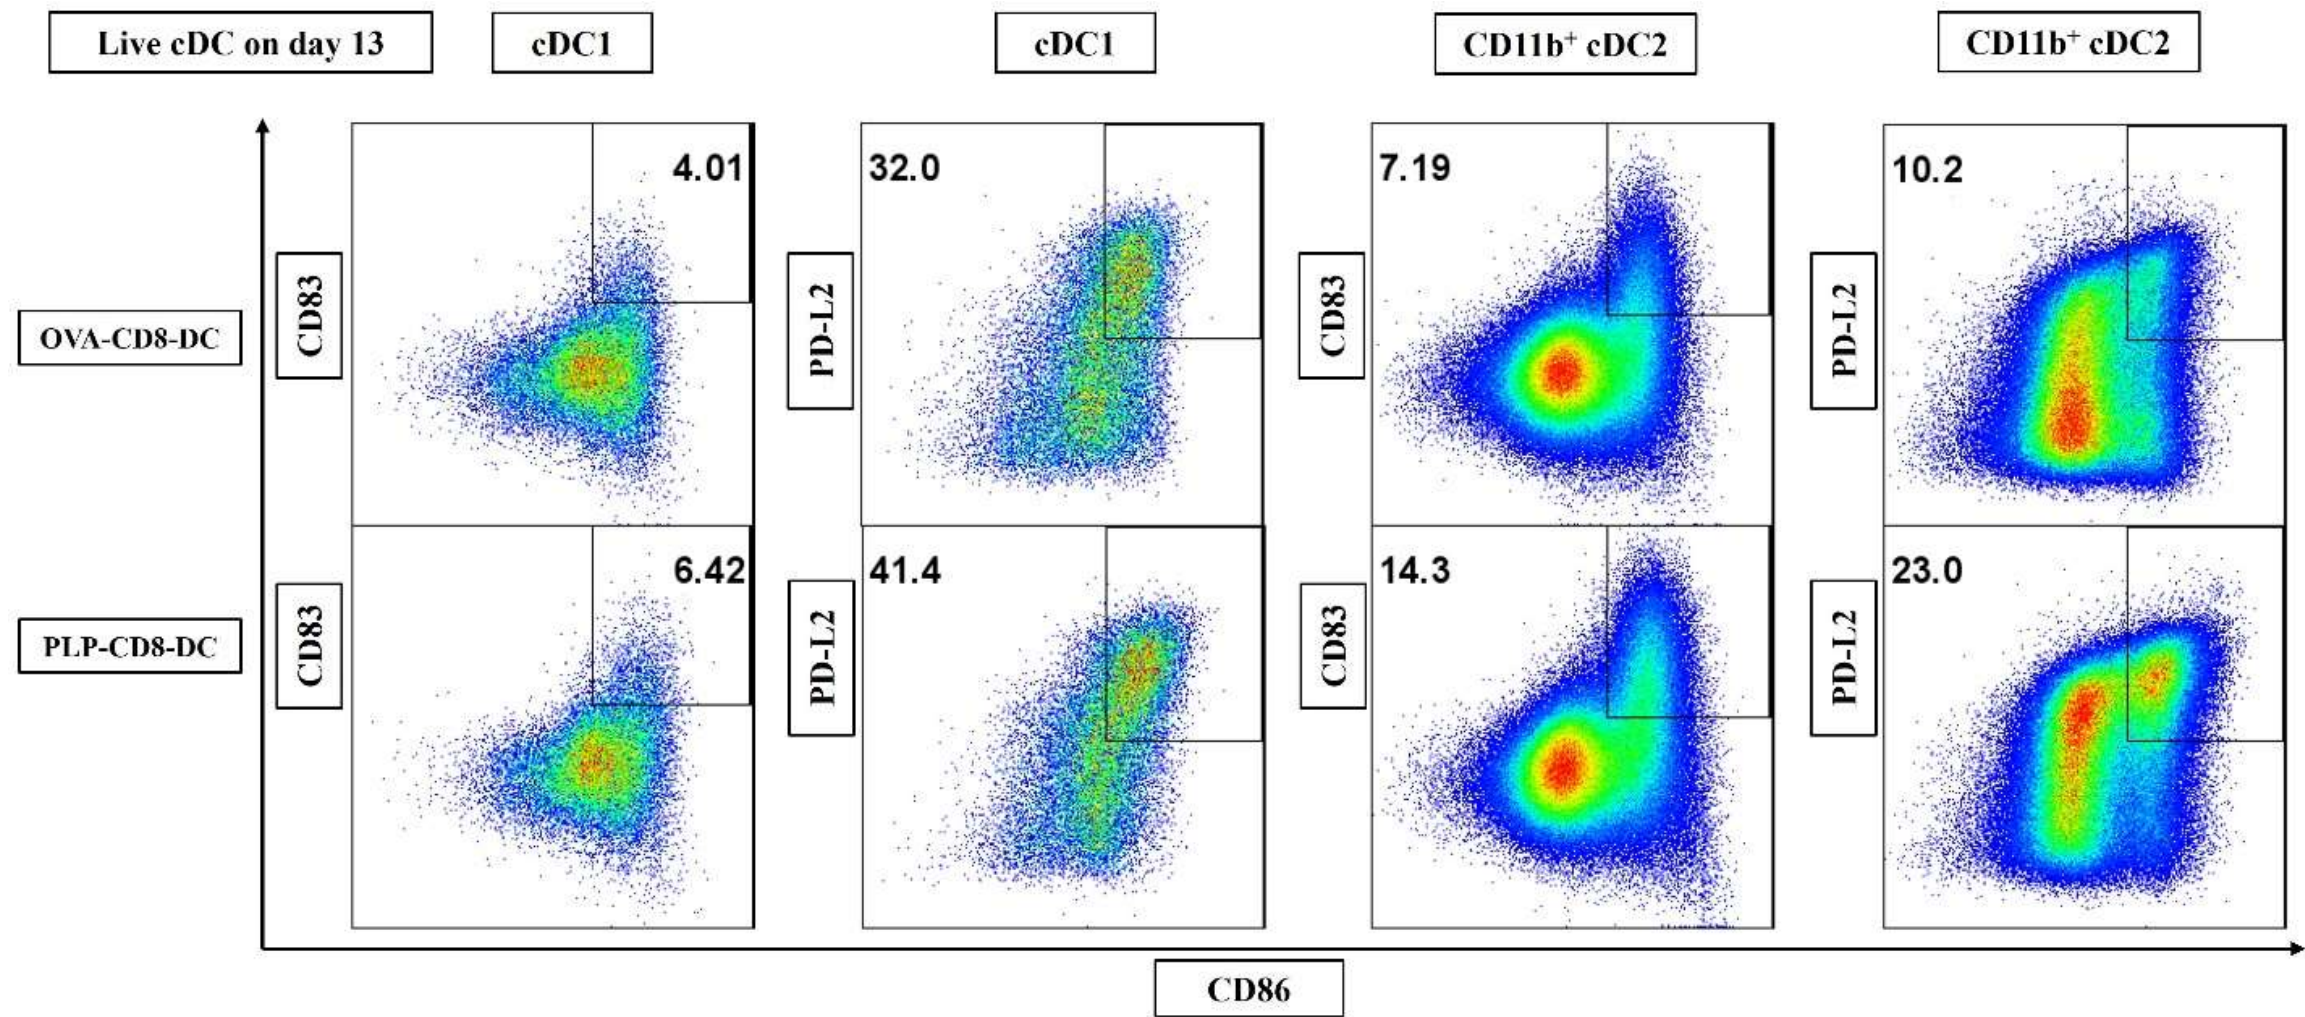

**Supplementary Figure 5: PLP-CD8-DC subsets exhibit higher co-expression of costimulatory and regulatory markers on day 13 post-EAE induction**

The representative pseudocolor plots demonstrate the co-expression of CD86 with CD83 and PD-L2 on live cDC1 and CD11b+ cDC isolated on day 13 post-EAE induction.

## Supplementary Figure 6: PLP-CD8 enhance maturation and regulatory marker expression on cDC subsets *in vitro*

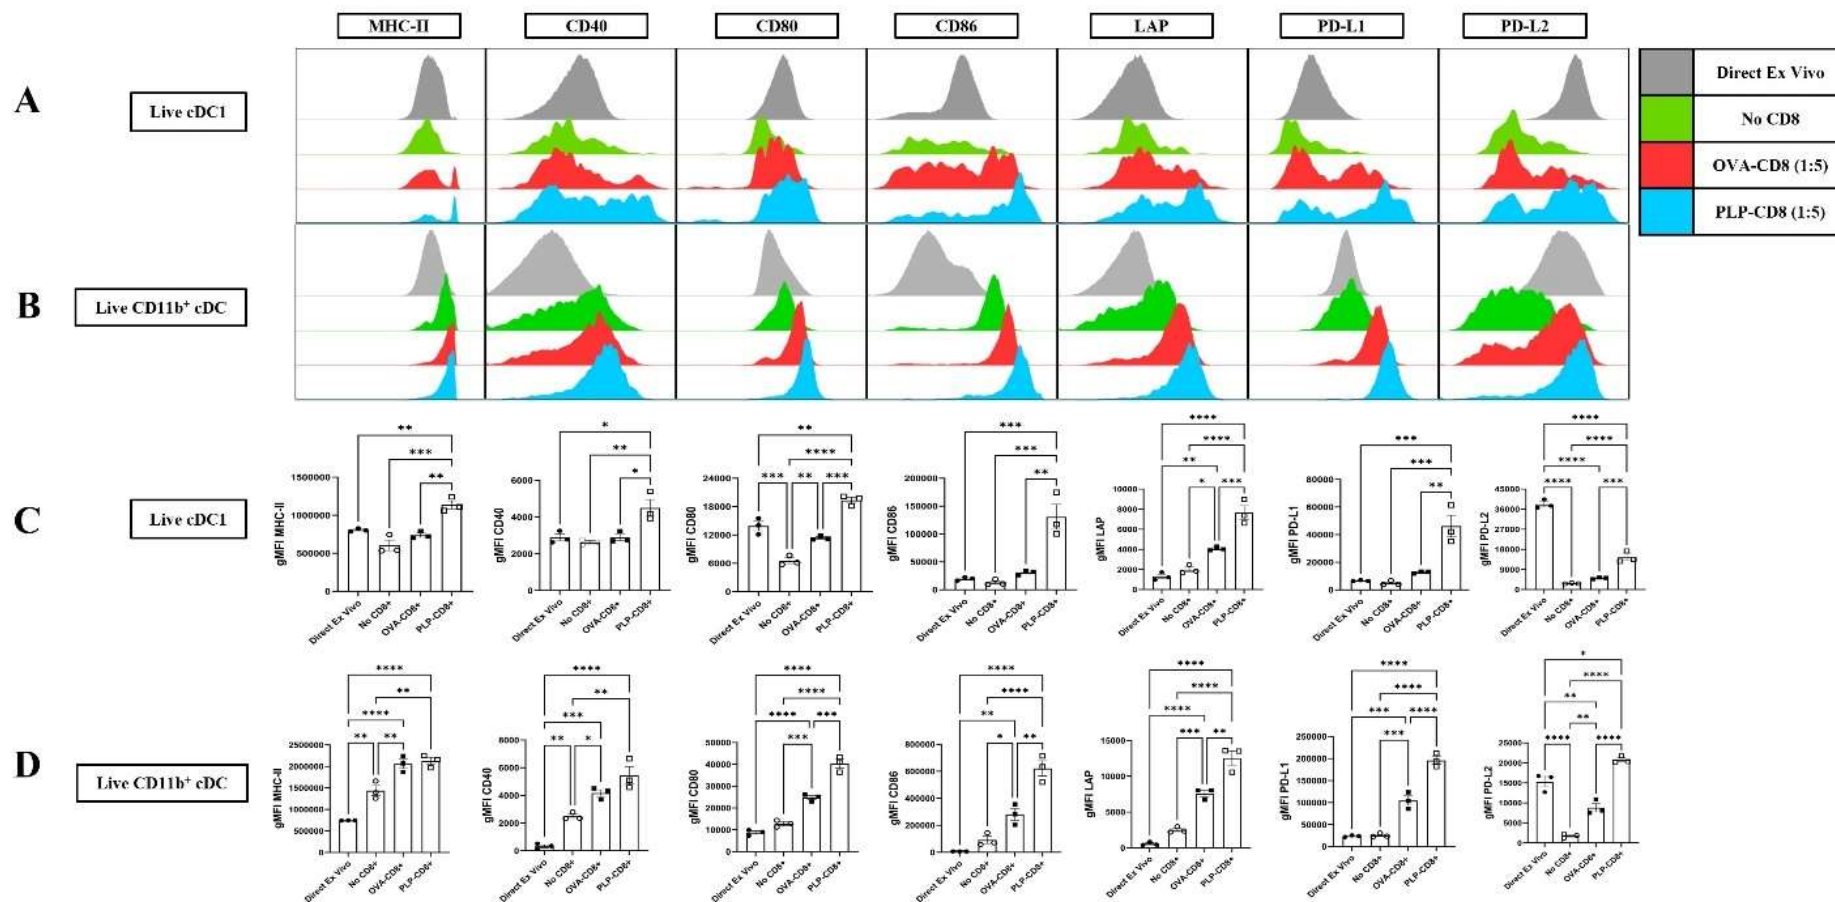

**Supplementary Figure 6: PLP-CD8 enhance maturation and regulatory marker expression on cDC subsets *in vitro***

DC from PLP-immunized mice were cultured with PLP-CD8 or OVA-CD8 in increasing ratios (1:1.25 to 1:5, DC: CD8<sup>+</sup>) in the presence of PLP<sub>178-191</sub> (20 µg/ml) and rIL-2 (10 pg/ml) for 24 hours. Freshly isolated DC (*Direct ex vivo*) and DC incubated without CD8<sup>+</sup> T cells (No CD8<sup>+</sup>) were used as controls. Following incubation, the expression of costimulatory and regulatory markers on live cDC1 and CD11b<sup>+</sup> cDC subsets was measured in geometric mean fluorescence intensity (gMFI) using flow cytometry. Panels **A** and **B** show the expression of the indicated markers on live cDC1 and CD11b<sup>+</sup> cDC, respectively, at a DC: CD8 ratio of 1:5. **C-D**) Expression of costimulatory and regulatory markers was significantly higher on live **C**) cDC1 and **D**) CD11b<sup>+</sup> cDC following incubation with PLP-CD8 (N = 3, Owo-Way ANOVA with multiple comparisons, \*p < 0.05, \*\*p < 0.01, \*\*\*p < 0.001, \*\*\*\*p < 0.0001).



## Supplementary Figure 7: Trans-well Assay: Experimental Setup

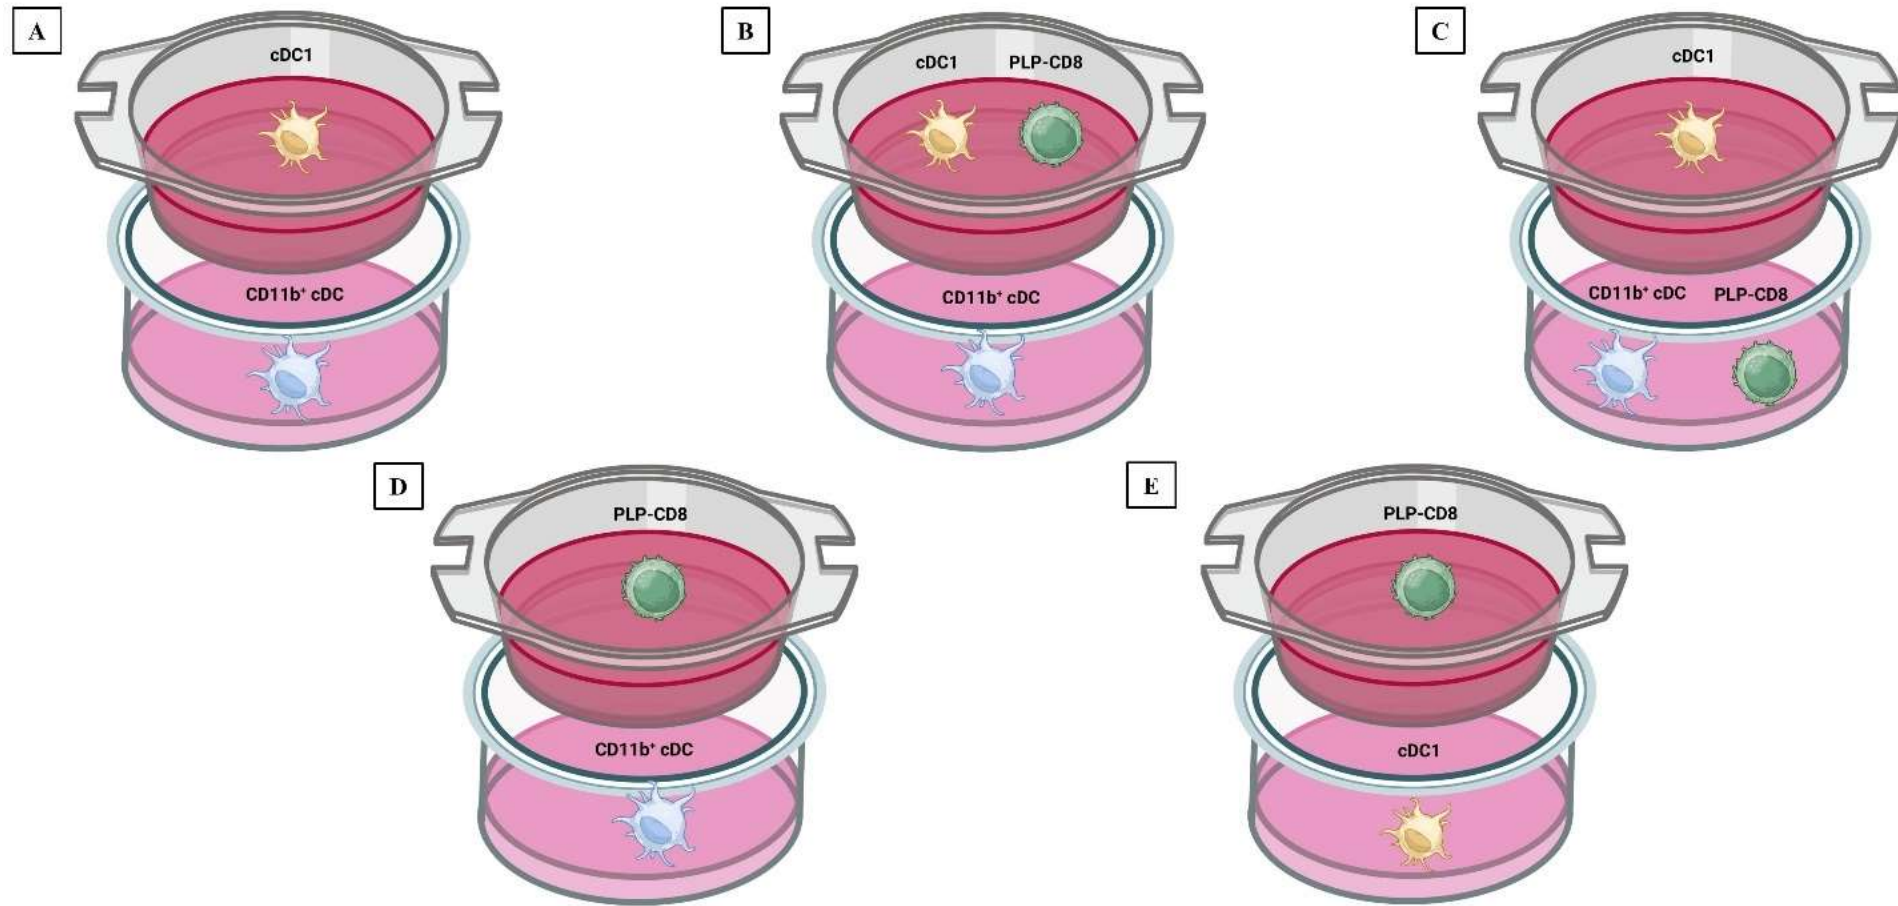

### Supplementary Figure 7: Trans-well Assay: Experimental Setup

The interaction of PLP-CD8 with either cDC subset and its effect on the other subset were studied using a trans-well assay. cDC1 and CD11b<sup>+</sup> cDC, were FACS-sorted from PLP-immunized mice 10 days post-immunization. CD11b<sup>+</sup> cDC (80,000) were seeded into the wells and cDC1 (20,000) into the inserts of the tissue-culture plate. PLP-CD8 (500,000) were added to either subset creating five conditions: Condition **A**: cDC1 in the inserts and CD11b<sup>+</sup> cDC in the wells without PLP-CD8; Condition **B**: cDC1 and PLP-CD8 in the insert and CD11b<sup>+</sup> cDC in the well; Condition **C**: cDC1 in the inserts and PLP-CD8 and CD11b<sup>+</sup> cDC in the wells; Condition **D**: PLP-CD8 in the inserts and CD11b<sup>+</sup> cDC in the wells without cDC1; and Condition **E**: PLP-CD8 in the inserts and cDC1 in the wells without CD11b<sup>+</sup> cDC. The cells were incubated with PLP<sub>178-191</sub> (20 µg/ml) and rIL-2 (10 pg/ml) for 24 hours, following which, supernatants were collected, and cells were analyzed using flow cytometry. These illustrations were generated in BioRender.

Supplementary Figure 8: Paracrine effects of PLP-CD8 on CD11b<sup>+</sup> cDC likely augmented by cDC1

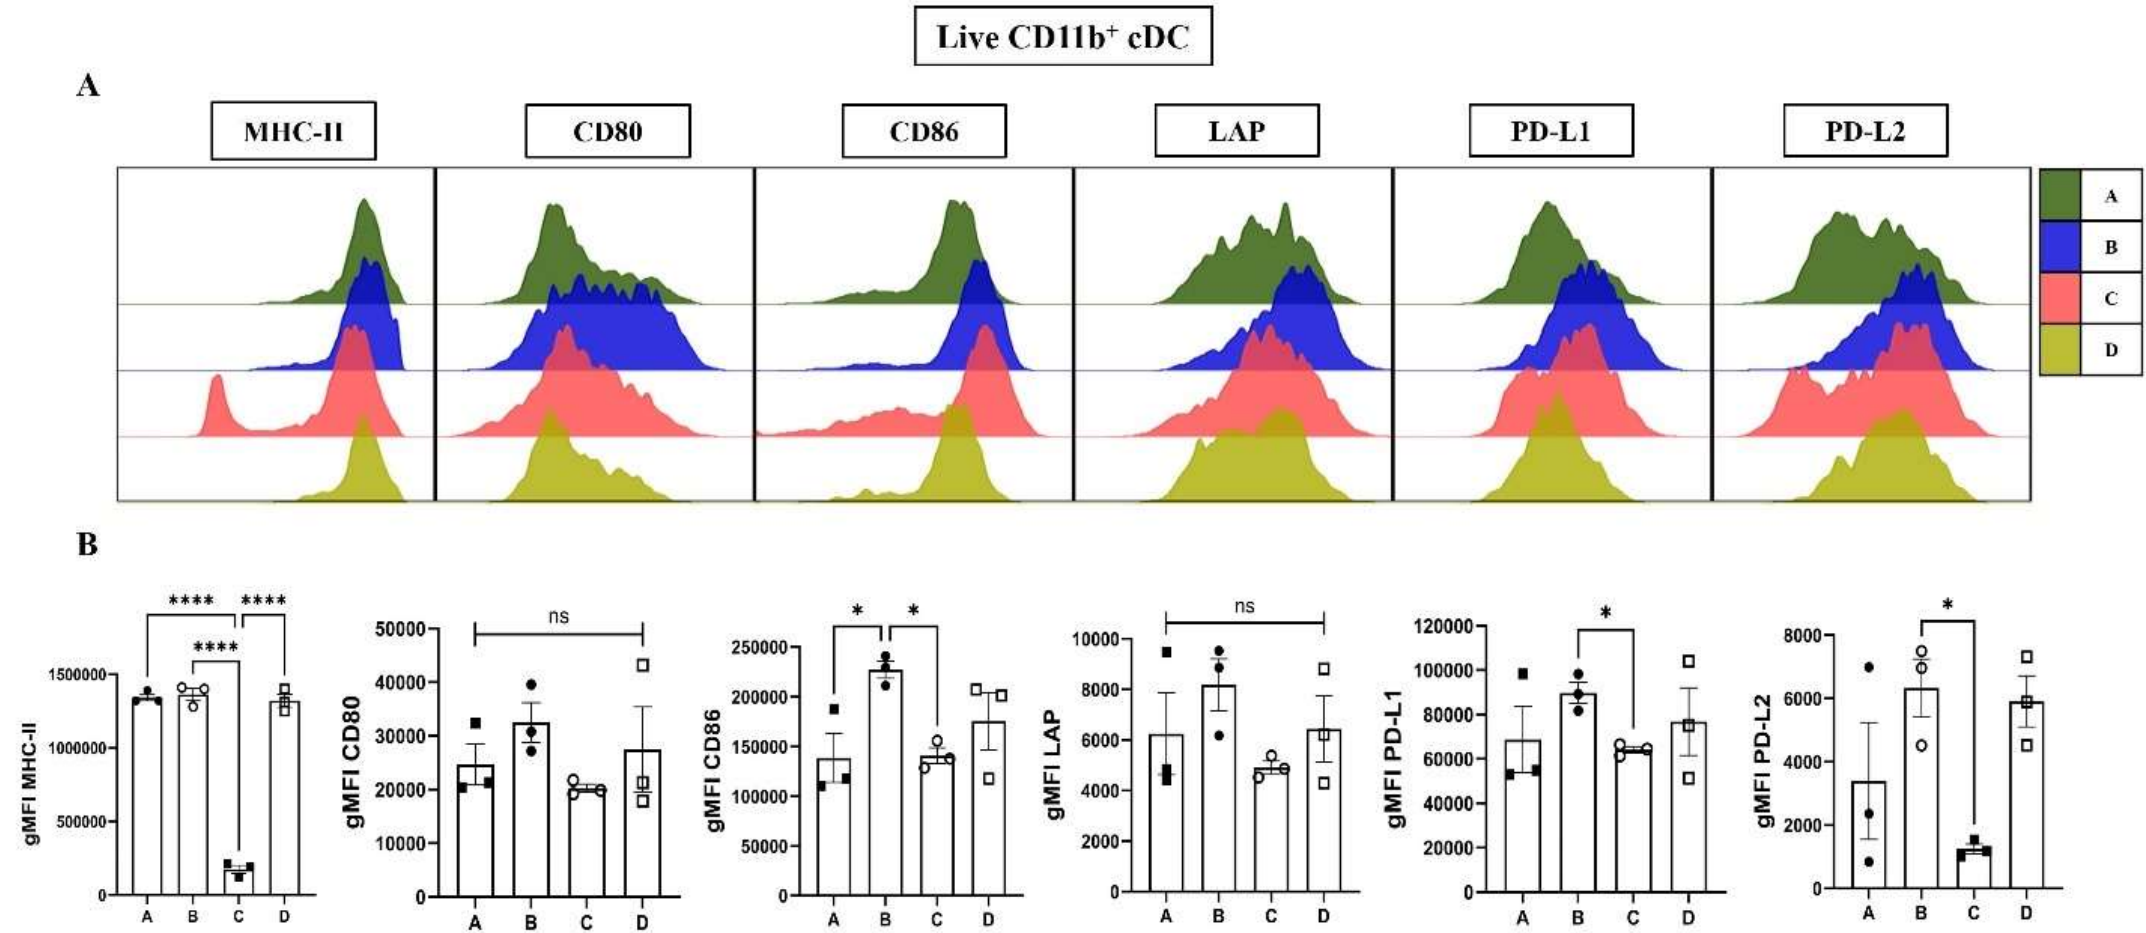

Supplementary Figure 8: Paracrine effects of PLP-CD8 on CD11b<sup>+</sup> cDC likely augmented by cDC1

Following 24 hours of incubation in the trans-well assay, the expression of costimulatory and regulatory markers on live CD11b<sup>+</sup> cDC was measured in geometric mean fluorescence intensity (gMFI). **A)** Shows the expression of these markers in different conditions. **B)** MHC-II expression on CD11b<sup>+</sup> cDC was significantly reduced in Condition C (CD11b<sup>+</sup> cDC in direct contact with PLP-CD8). CD11b<sup>+</sup> cDC in Condition B (cDC1 in direct contact with PLP-CD8) displayed significantly higher expression of CD86 than in Condition A (cDC1 separated from CD11b<sup>+</sup> cDC without PLP-CD8) and in Condition C. Expression of PD-L1 and PD-L2 on CD11b<sup>+</sup> cDC was significantly higher in Condition B than in Condition C (N = 3, One-Way ANOVA with multiple comparisons, ns = not significant, \*p < 0.05, \*\*\*\*p < 0.0001).



**Supplementary Figure 9: Coexpression of costimulatory and regulatory molecules on live CD11b<sup>+</sup> cDC in different trans-well conditions**

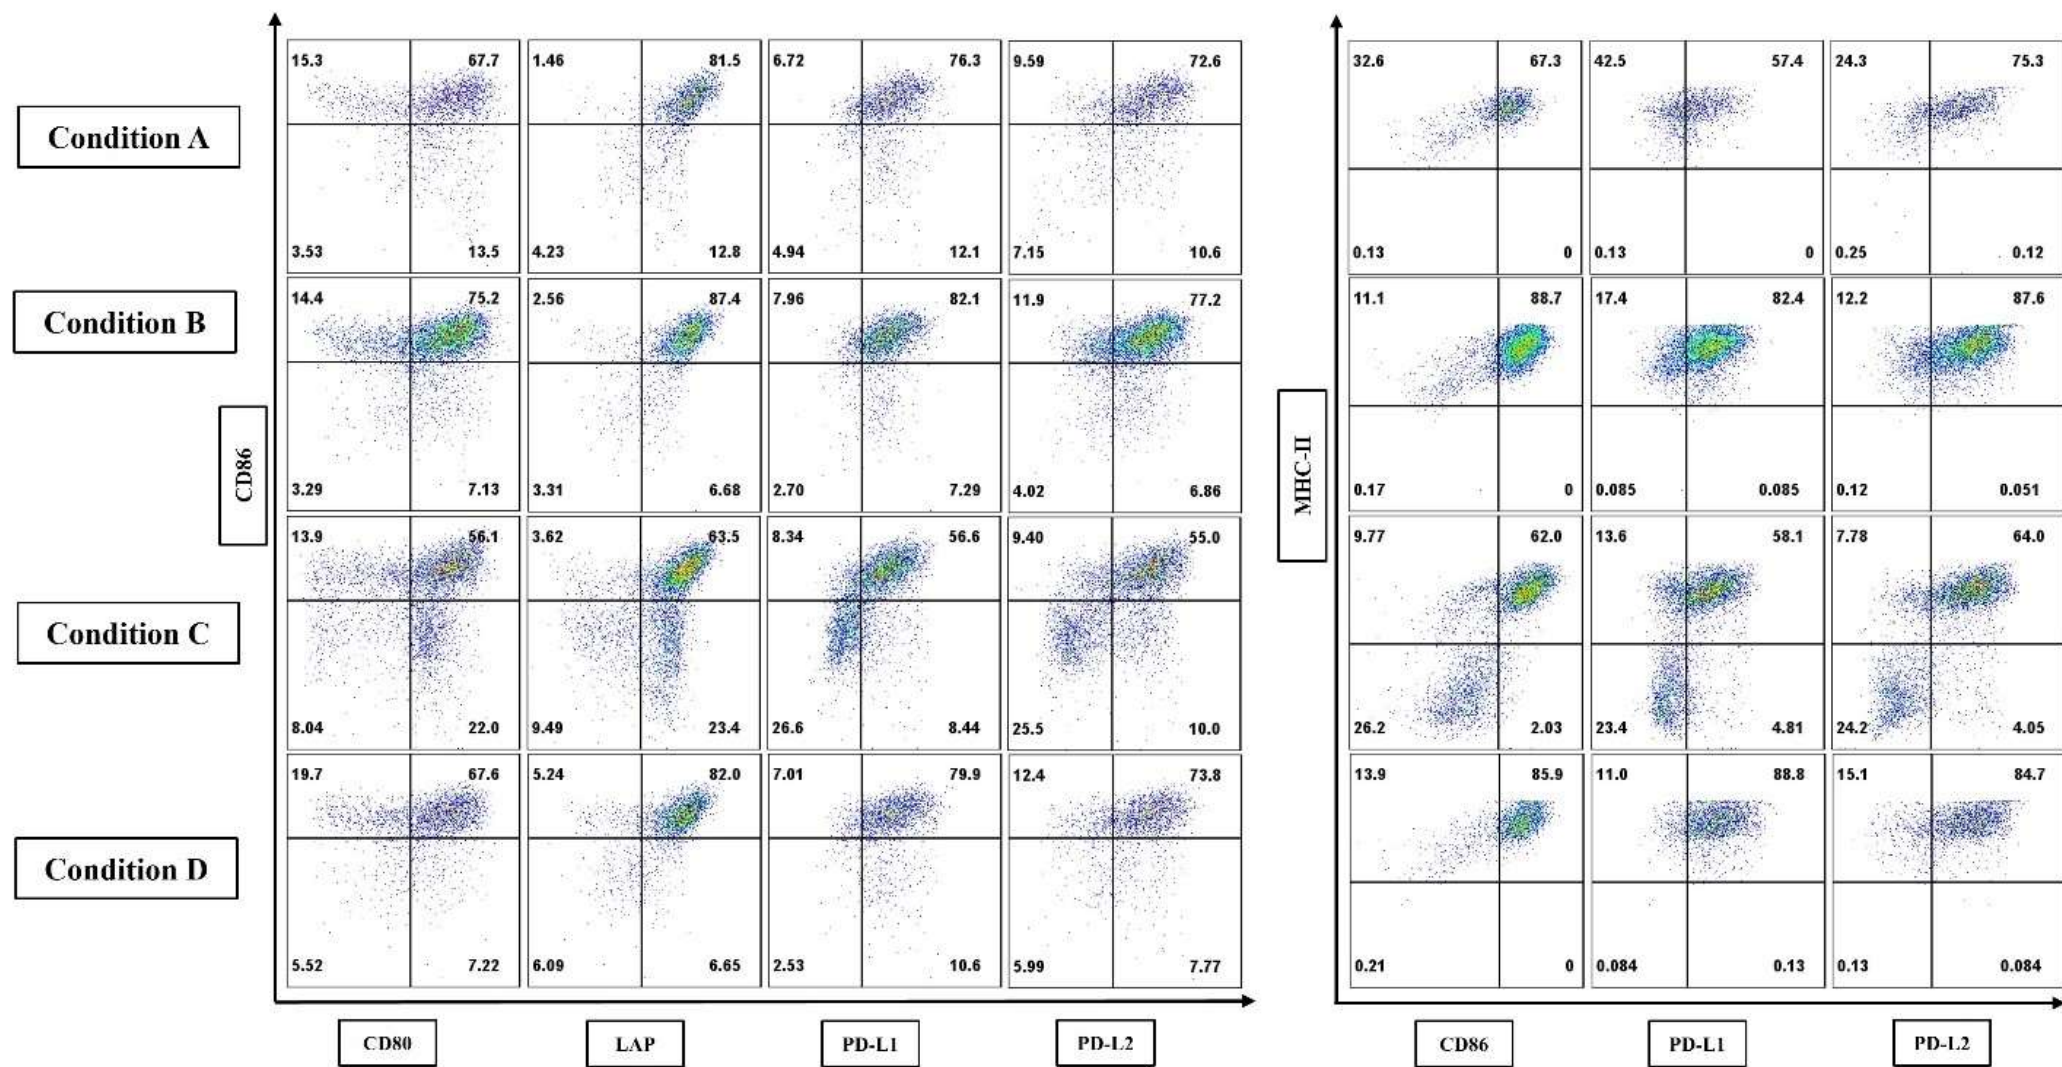

**Supplementary Figure 9: Coexpression of costimulatory and regulatory molecules on live CD11b<sup>+</sup> cDC in different trans-well conditions**

This panel shows the co-expression of CD86 or MHC-II with other costimulatory and regulatory markers on live CD11b<sup>+</sup> cDC in Conditions A-D in pseudocolor plots.

**Supplemental Figure 10: PLP-CD8-conditioned supernatants promote survival, maturation, and regulatory marker expression in CD11b<sup>+</sup> cDC**

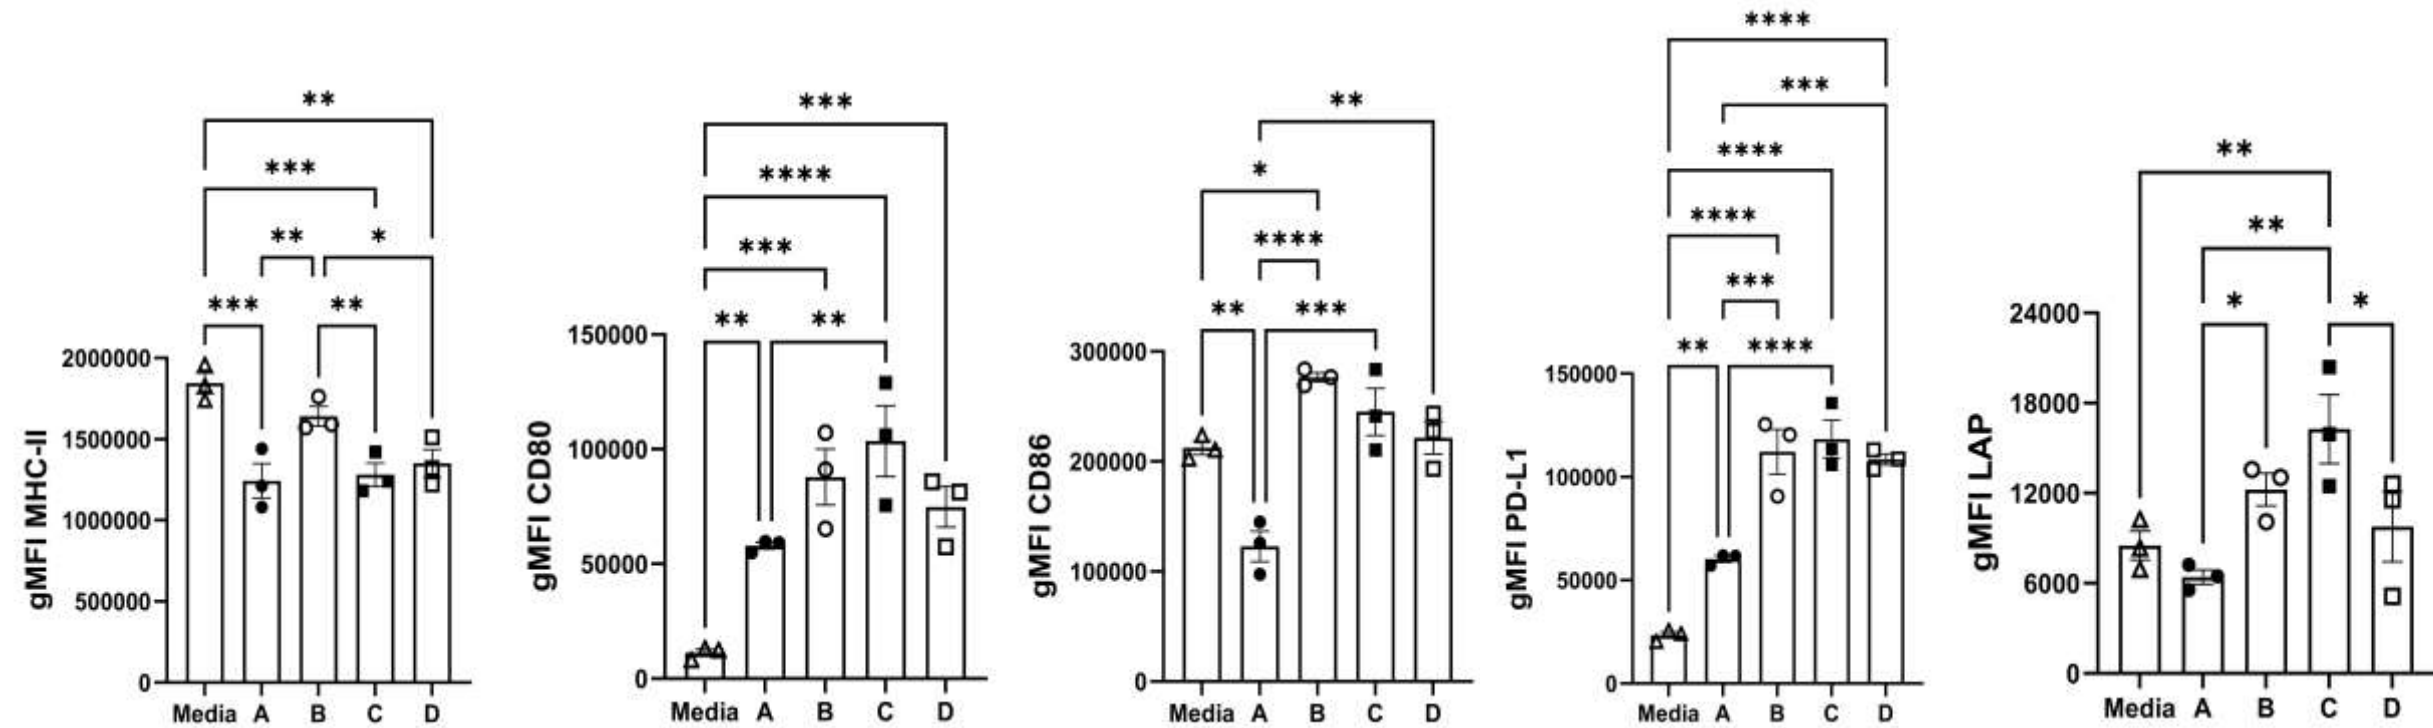

**Supplemental Figure 10: PLP-CD8-conditioned supernatants promote survival, maturation, and regulatory marker expression in CD11b<sup>+</sup> cDC**

CD11b<sup>+</sup> cDC (45,000) were incubated with 500  $\mu$ l of complete media or supernatants from the four conditions of the trans-well assay, sups A-D, for 24 hours and analyzed using flow cytometry. Costimulatory and regulatory markers on live CD11b<sup>+</sup> cDC were quantified in geometric mean fluorescence intensity (gMFI). Incubation with Media had varying effects on the expression of different markers on CD11b<sup>+</sup> cDC. MHC-II expression on CD11b<sup>+</sup> cDC was highest when incubated with Media and was significantly higher with sup B (cDC1 in direct contact with PLP-CD8) than with other sups. In contrast, the expression of CD80, CD86, PD-L1 and PD-L2 on CD11b<sup>+</sup> cDC was lower with sup A (cDC1 separated from CD11b<sup>+</sup> cDC without PLP-CD8) than with other sups from conditions involving PLP-CD8 (N = 3, One-Way ANOVA with multiple comparisons, \*p < 0.05, \*\*p < 0.01, \*\*\*p < 0.001, \*\*\*\*p < 0.0001).

# Supplementary Figure 11: Single-cell RNA-sequencing – Unsupervised clustering and cell type annotation

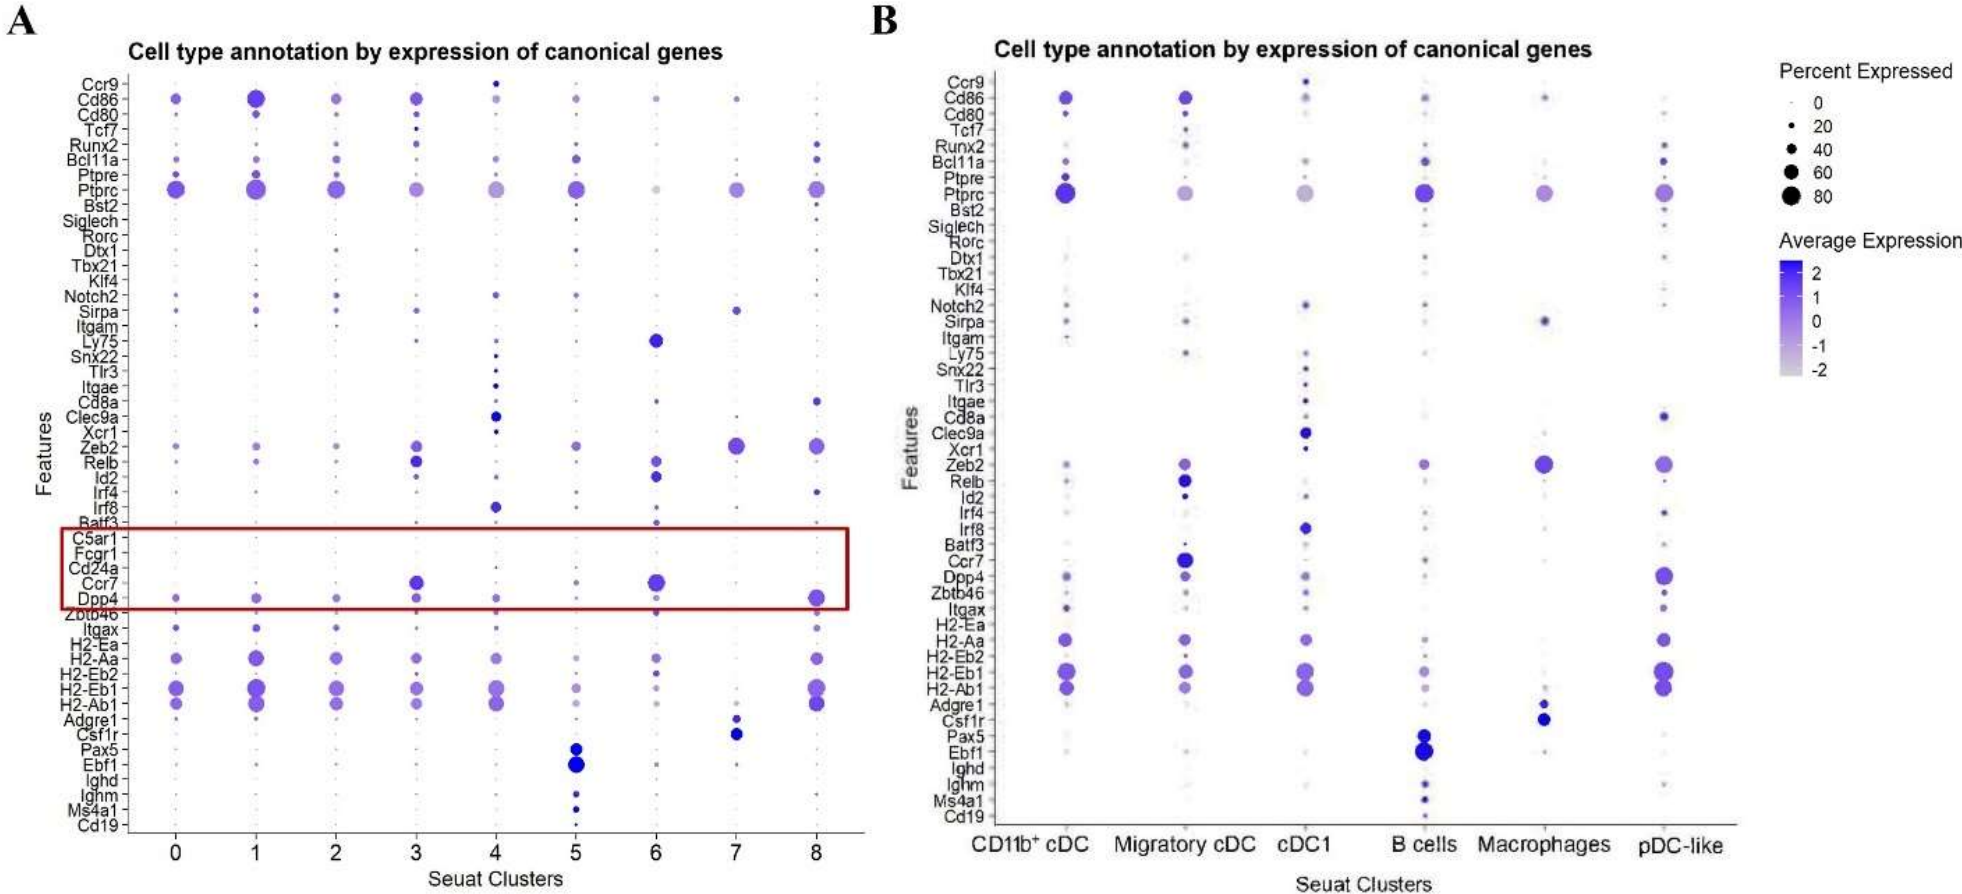

Supplementary Figure 11: Single-cell RNA-sequencing – Unsupervised clustering and cell type annotation

PLP-CD8-DC and OVA-CD8-DC isolated on day 12 post-EAE induction were prepared for single-cell RNA sequencing (Parse Biosciences). Data were analyzed using the Seurat package in R. Unsupervised clustering identified 9 distinct Seurat clusters. Canonical gene expression was used to designate different cell types. Panel **A**) shows the dot plot of canonical gene expression across 9 Seurat clusters while panel **B**) shows the dot plot of canonical gene expression in annotated Seurat clusters. Clusters 0, 1, 2, 3, and 6 exhibited similar gene expression patterns consistent with cDC2 or related DC subsets, characterized by the expression of CD11b (*Itgam*) and SIRP- $\alpha$  (*Sirpa*). Clusters 3 and 6 were designated as Migratory cDC due to their expression of *Ccr7*. The remaining four clusters in this group lacked CD24 (*Cd24a*), CD64 (*Fcgr1*), and CD88 (*C5ar1*) but expressed CD26 (*Dpp4*), making monocyte-derived DC (moDC) or inflammatory DC unlikely and supporting their classification as cDC2. For clarity and convenience, we collectively refer to this group as CD11b<sup>+</sup> cDC.



Supplementary Figure 12: Single-cell RNA-sequencing – Differential gene expression (DGE) and downstream analysis

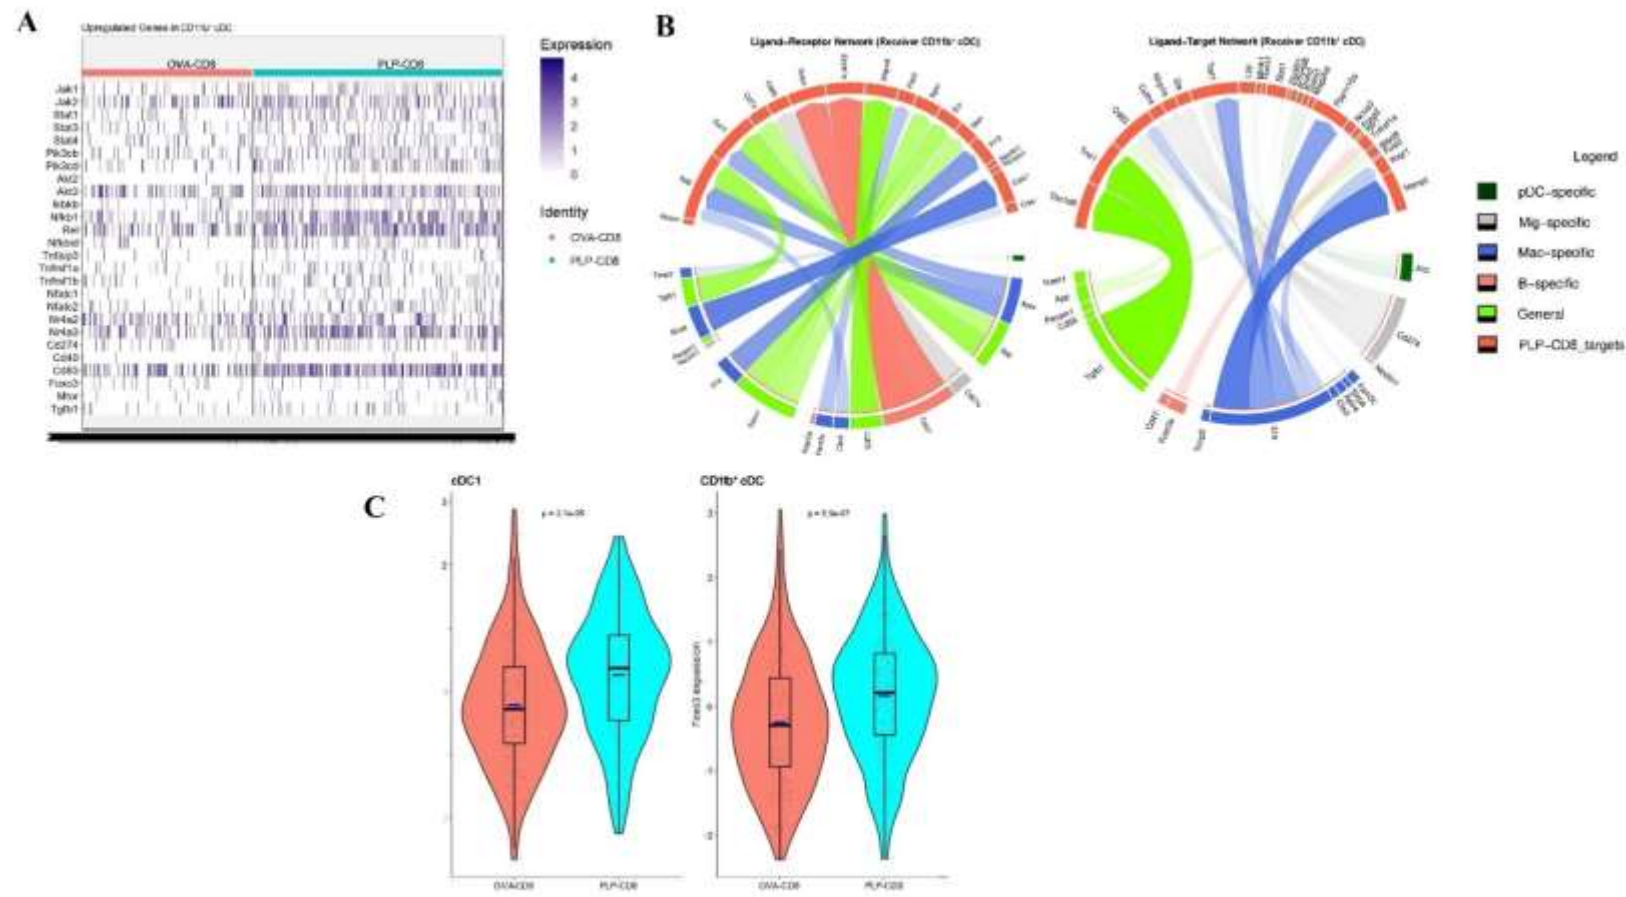

Supplementary Figure 12: Single-cell RNA-sequencing – Differential gene expression (DGE) and downstream analysis

Differential gene expression (DGE) was analyzed within each annotated cluster between the two CD8 treatments, PLP-CD8 and OVA-CD8. No significant DGE was observed in B cells, Macrophages, pDC-like cells and Migratory cDC. The highest number of differentially expressed genes were found in CD11b<sup>+</sup> cDC followed by cDC1. Panel A) shows a heatmap of representative genes upregulated in the CD11b<sup>+</sup> cDC subset from PLP-CD8 recipients. NicheNet analysis was performed to model potential intercellular communication between CD11b<sup>+</sup> cDC and other DC subsets and non-DC cell types. A list of prioritized ligands important for intercellular communication was generated from the dataset with their target and receptor genes upregulated in CD11b<sup>+</sup> cDC from PLP-CD8 recipients. Panel B) shows the ligand-receptor and ligand-target networks using Circos plots. Panel C) shows significant upregulation of *Foxo3*, a key immunoregulatory transcription factor in cDC1 and CD11b<sup>+</sup> cDC from PLP-CD8 recipients identified using DecoupleR analysis.
